# Supplementary material for: A wealth of structures for the Ge2H2+ radical cation: comparison of theory and experiment
Source: Royal Society of Chemistry journal article supplement (doi:10.1039/d3cp06098e), 2024-01-01
Supplement: d3cp06098e1.pdf [file d3cp06098e1.pdf]

## Supplementary Information

*CCSD(T)/cc-pwCVTZ-PP harmonic vibrational frequencies in  $\text{cm}^{-1}$  are reported for the neutral minimum structures.*

| <b>Butterfly</b> | <b>Monobridged</b> | <b>Germlydene</b> | <b>Trans</b>   |
|------------------|--------------------|-------------------|----------------|
| $C_{2v}$         | $C_s$              | $C_{2v}$          | $C_{2h}$       |
| 288 ( $a_1$ )    | 176 ( $a''$ )      | 225 ( $b_2$ )     | 213 ( $a_u$ )  |
| 810 ( $a_1$ )    | 320 ( $a'$ )       | 299 ( $b_1$ )     | 228 ( $b_u$ )  |
| 1019 ( $a_2$ )   | 480 ( $a'$ )       | 309 ( $a_1$ )     | 330 ( $a_g$ )  |
| 1094 ( $b_2$ )   | 1013 ( $a'$ )      | 832 ( $a_1$ )     | 593 ( $a_g$ )  |
| 1433 ( $b_1$ )   | 1539 ( $a'$ )      | 2123 ( $a_1$ )    | 2066 ( $a_g$ ) |
| 1515 ( $a_1$ )   | 2071 ( $a'$ )      | 2147 ( $b_2$ )    | 2080 ( $b_u$ ) |

*CCSD(T)/cc-pwCVTZ-PP harmonic vibrational frequencies in  $\text{cm}^{-1}$  are reported for the cationic minimum structures.*

| <b>Butterfly</b> | <b>Monobridged</b> | <b>Germlydene</b> | <b>Trans</b>   |
|------------------|--------------------|-------------------|----------------|
| $C_{2v}$         | $C_s$              | $C_{2v}$          | $C_{2h}$       |
| 196 ( $a_1$ )    | 151 ( $a''$ )      | 256 ( $a_1$ )     | 149 ( $a_u$ )  |
| 795 ( $a_1$ )    | 271 ( $a'$ )       | 271 ( $b_2$ )     | 185 ( $b_u$ )  |
| 1026 ( $a_2$ )   | 471 ( $a'$ )       | 384 ( $b_1$ )     | 272 ( $a_g$ )  |
| 1131 ( $b_2$ )   | 944 ( $a'$ )       | 829 ( $a_1$ )     | 601 ( $a_g$ )  |
| 1405 ( $b_1$ )   | 1482 ( $a'$ )      | 2158 ( $a_1$ )    | 2079 ( $a_g$ ) |
| 1511 ( $a_1$ )   | 2096 ( $a'$ )      | 2196 ( $b_2$ )    | 2090 ( $b_u$ ) |

Vibration-Rotation constants of the neutral butterfly and monobridged  $Ge_2H_2$  structures computed from  
*CCSD(T)/cc-pwCVTZ-PP anharmonic vibrational frequencies*

| Geometry           | Rot Constant ( $cm^{-1}$ ) | Mode   | Vib-Rot Constant ( $cm^{-1}$ ) |
|--------------------|----------------------------|--------|--------------------------------|
| <b>Butterfly</b>   | $A = 5.0043$               | $a_1$  | -0.0287                        |
|                    |                            | $a_1$  | 0.0825                         |
|                    |                            | $a_2$  | 0.1864                         |
|                    |                            | $b_2$  | 0.1648                         |
|                    |                            | $b_1$  | 0.0142                         |
|                    | $B = 0.0818$               | $a_1$  | -0.0666                        |
|                    |                            | $a_1$  | 0.0003                         |
|                    |                            | $a_1$  | 0.0005                         |
|                    |                            | $a_2$  | 0.0000                         |
|                    |                            | $b_2$  | -0.0001                        |
|                    | $C = 0.0815$               | $b_1$  | 0.0004                         |
|                    |                            | $a_1$  | 0.0002                         |
|                    |                            | $a_1$  | 0.0003                         |
|                    |                            | $a_1$  | 0.0004                         |
|                    |                            | $a_2$  | 0.0000                         |
| <b>Monobridged</b> | $A = 7.8687$               | $b_2$  | 0.0000                         |
|                    |                            | $b_1$  | 0.0003                         |
|                    |                            | $a_1$  | 0.0001                         |
|                    |                            | $a''$  | 1.1260                         |
|                    |                            | $a'$   | -0.1678                        |
|                    | $B = 0.0891$               | $a'$   | -0.7313                        |
|                    |                            | $a'$   | 0.0390                         |
|                    |                            | $a'$   | 0.0300                         |
|                    |                            | $a'$   | 0.0577                         |
|                    |                            | $a''$  | 0.0004                         |
|                    | $C = 0.0881$               | $a'$   | 0.0003                         |
|                    |                            | $a'$   | 0.0000                         |
|                    |                            | $a'$   | -0.0001                        |
|                    |                            | $a'$   | 0.0003                         |
|                    |                            | $a'$   | 0.0001                         |
|                    | $a''$                      | 0.0003 |                                |
|                    | $a'$                       | 0.0003 |                                |
|                    | $a'$                       | 0.0001 |                                |
|                    | $a'$                       | 0.0000 |                                |
|                    | $a'$                       | 0.0003 |                                |
|                    |                            | $a'$   | 0.0002                         |

Vibration-Rotation constants of the neutral germylidene and trans  $Ge_2H_2$  structures computed from  
 CCSD(T)/cc-pwCVTZ-PP anharmonic vibrational frequencies

| Geometry    | Rot Constant ( $cm^{-1}$ ) | Mode  | Vib-Rot Constant ( $cm^{-1}$ ) |
|-------------|----------------------------|-------|--------------------------------|
| Germylidene | A = 5.3594                 | $a''$ | 0.3727                         |
|             |                            | $a'$  | -0.4278                        |
|             |                            | $a'$  | 0.0000                         |
|             |                            | $a'$  | -0.0555                        |
|             |                            | $a'$  | 0.0733                         |
|             |                            | $a'$  | 0.0480                         |
|             | B = 0.0837                 | $a''$ | -0.0003                        |
|             |                            | $a'$  | 0.0002                         |
|             |                            | $a'$  | 0.0003                         |
|             |                            | $a'$  | 0.0001                         |
|             |                            | $a'$  | 0.0001                         |
|             |                            | $a'$  | 0.0000                         |
|             | C = 0.0824                 | $a''$ | -0.0002                        |
|             |                            | $a'$  | 0.0001                         |
|             |                            | $a'$  | 0.0003                         |
|             |                            | $a'$  | 0.0000                         |
|             |                            | $a'$  | 0.0001                         |
|             |                            | $a'$  | 0.0001                         |
| Trans       | A = 5.4074                 | $a''$ | 2.9035                         |
|             |                            | $a'$  | -2.7428                        |
|             |                            | $a'$  | 0.0034                         |
|             |                            | $a'$  | -0.1794                        |
|             |                            | $a'$  | 0.0979                         |
|             |                            | $a'$  | 0.1000                         |
|             | B = 0.0908                 | $a''$ | 0.0029                         |
|             |                            | $a'$  | -0.0011                        |
|             |                            | $a'$  | 0.0003                         |
|             |                            | $a'$  | -0.0001                        |
|             |                            | $a'$  | 0.0002                         |
|             |                            | $a'$  | 0.0002                         |
|             | C = 0.0893                 | $a''$ | 0.0015                         |
|             |                            | $a'$  | 0.0002                         |
|             |                            | $a'$  | 0.0003                         |
|             |                            | $a'$  | 0.0000                         |
|             |                            | $a'$  | 0.0002                         |
|             |                            | $a'$  | 0.0002                         |

Vibration-Rotation constants of the cationic butterfly and monobridged  $Ge_2H_2^+$  structures computed from  
 CCSD(T)/cc-pwCVTZ-PP anharmonic vibrational frequencies

| Geometry           | Rot Constant ( $cm^{-1}$ ) | Mode  | Vib-Rot Constant ( $cm^{-1}$ ) |
|--------------------|----------------------------|-------|--------------------------------|
| <b>Butterfly</b>   | $A = 5.2195$               | $a_1$ | -0.0568                        |
|                    |                            | $a_1$ | 0.0488                         |
|                    |                            | $a_2$ | 0.2251                         |
|                    |                            | $b_2$ | 0.1858                         |
|                    |                            | $b_1$ | -0.0616                        |
|                    |                            | $a_1$ | -0.0642                        |
|                    | $B = 0.0757$               | $a_1$ | 0.0004                         |
|                    |                            | $a_1$ | 0.0010                         |
|                    |                            | $a_2$ | -0.0005                        |
|                    |                            | $b_2$ | -0.0004                        |
|                    |                            | $b_1$ | 0.0007                         |
|                    |                            | $a_1$ | 0.0002                         |
|                    | $C = 0.0753$               | $a_1$ | 0.0004                         |
|                    |                            | $a_1$ | 0.0010                         |
|                    |                            | $a_2$ | -0.0004                        |
|                    |                            | $b_2$ | -0.0003                        |
|                    |                            | $b_1$ | 0.0007                         |
|                    |                            | $a_1$ | 0.0002                         |
| <b>Monobridged</b> | $A = 7.7011$               | $a''$ | 1.1624                         |
|                    |                            | $a'$  | -0.1684                        |
|                    |                            | $a'$  | -0.6804                        |
|                    |                            | $a'$  | 0.0048                         |
|                    |                            | $a'$  | 0.0041                         |
|                    |                            | $a'$  | 0.0625                         |
|                    | $B = 0.0811$               | $a''$ | 0.0003                         |
|                    |                            | $a'$  | 0.0003                         |
|                    |                            | $a'$  | 0.0000                         |
|                    |                            | $a'$  | -0.0001                        |
|                    |                            | $a'$  | 0.0004                         |
|                    |                            | $a'$  | 0.0002                         |
|                    | $C = 0.0802$               | $a''$ | 0.0002                         |
|                    |                            | $a'$  | 0.0004                         |
|                    |                            | $a'$  | 0.0000                         |
|                    |                            | $a'$  | 0.0000                         |
|                    |                            | $a'$  | 0.0004                         |
|                    |                            | $a'$  | 0.0002                         |

Vibration-Rotation constants of the cationic germylidene and trans  $Ge_2H_2^+$  structures computed from  
 CCSD(T)/cc-pwCVTZ-PP anharmonic vibrational frequencies

| Geometry    | Rot Constant ( $cm^{-1}$ ) | Mode  | Vib-Rot Constant ( $cm^{-1}$ ) |
|-------------|----------------------------|-------|--------------------------------|
| Germylidene | A = 5.2112                 | $a''$ | -0.0029                        |
|             |                            | $a'$  | 0.1683                         |
|             |                            | $a'$  | -0.02319                       |
|             |                            | $a'$  | -0.0516                        |
|             |                            | $a'$  | 0.0714                         |
|             |                            | $a'$  | 0.0500                         |
|             | B = 0.0748                 | $a''$ | 0.0003                         |
|             |                            | $a'$  | -0.0002                        |
|             |                            | $a'$  | 0.0000                         |
|             |                            | $a'$  | -0.0001                        |
|             |                            | $a'$  | 0.0001                         |
|             |                            | $a'$  | 0.0000                         |
|             | C = 0.0737                 | $a''$ | 0.0003                         |
|             |                            | $a'$  | -0.0002                        |
|             |                            | $a'$  | 0.0000                         |
|             |                            | $a'$  | 0.0000                         |
|             |                            | $a'$  | 0.0001                         |
|             |                            | $a'$  | 0.0000                         |
| Trans       | A = 5.1838                 | $a''$ | 1.1809                         |
|             |                            | $a'$  | -1.1477                        |
|             |                            | $a'$  | 0.0025                         |
|             |                            | $a'$  | -0.1531                        |
|             |                            | $a'$  | 0.0797                         |
|             |                            | $a'$  | 0.0800                         |
|             | B = 0.0821                 | $a''$ | 0.0019                         |
|             |                            | $a'$  | -0.0003                        |
|             |                            | $a'$  | 0.0004                         |
|             |                            | $a'$  | 0.0000                         |
|             |                            | $a'$  | 0.0002                         |
|             |                            | $a'$  | 0.0002                         |
|             | C = 0.0808                 | $a''$ | 0.0013                         |
|             |                            | $a'$  | 0.0003                         |
|             |                            | $a'$  | 0.0004                         |
|             |                            | $a'$  | 0.0000                         |
|             |                            | $a'$  | 0.0002                         |
|             |                            | $a'$  | 0.0002                         |
